# Supplementary material for: Pattern of distant metastases in inflammatory breast cancer - A large-cohort retrospective study
Source: PubMed Central journal article supplement (PMC6930435; doi:10.7150/jca.34572), 2020-01-01

**Supplementary Table 1.** Baseline clinical characteristics of inflammatory breast cancer patients in the validation cohort.

| Characteristics              | No metastasis |      | Metastasis |      | P value |
|------------------------------|---------------|------|------------|------|---------|
|                              | Number        | %    | Number     | %    |         |
| Subtype                      |               |      |            |      | 0.521   |
| HR+/HER2-                    | 45            | 27.8 | 29         | 36.3 |         |
| HR+/HER2+                    | 35            | 21.6 | 17         | 21.3 |         |
| HR-/HER2+                    | 43            | 26.5 | 16         | 20.0 |         |
| TNBC                         | 39            | 24.1 | 18         | 22.5 |         |
| Age                          |               |      |            |      | 0.982   |
| <50                          | 42            | 25.9 | 21         | 26.3 |         |
| 51-65                        | 87            | 53.7 | 42         | 52.5 |         |
| ≥65                          | 33            | 20.4 | 17         | 21.3 |         |
| Marital status               |               |      |            |      | 0.917   |
| Married                      | 80            | 49.4 | 40         | 50.0 |         |
| Unmarried                    | 74            | 45.7 | 37         | 46.3 |         |
| Unknown                      | 8             | 4.9  | 3          | 3.8  |         |
| Race                         |               |      |            |      | 0.447   |
| White                        | 118           | 72.8 | 55         | 68.8 |         |
| Black                        | 28            | 17.3 | 19         | 23.8 |         |
| Others $\Delta$              | 16            | 9.9  | 6          | 7.5  |         |
| Grade                        |               |      |            |      | 0.067   |
| I                            | 5             | 3.1  | 0          | 0    |         |
| II                           | 31            | 19.1 | 21         | 26.3 |         |
| III                          | 95            | 58.6 | 35         | 43.8 |         |
| IV                           | 1             | 0.6  | 1          | 1.3  |         |
| Unknown                      | 30            | 18.5 | 23         | 28.7 |         |
| Size (cm)                    |               |      |            |      | 0.013   |
| <2.0                         | 13            | 8.0  | 4          | 5.0  |         |
| 2.0-4.9                      | 34            | 21.0 | 11         | 13.8 |         |
| ≥5.0                         | 65            | 40.1 | 23         | 28.7 |         |
| Unknown                      | 50            | 30.9 | 42         | 52.5 |         |
| Regional lymph node invasion |               |      |            |      | 0.072   |
| N0                           | 19            | 11.7 | 10         | 12.5 |         |
| N1                           | 69            | 42.6 | 30         | 37.5 |         |
| N2                           | 37            | 22.8 | 15         | 18.8 |         |
| N3                           | 34            | 21.0 | 17         | 21.3 |         |
| NX                           | 3             | 1.9  | 8          | 10.0 |         |
| Surgery                      |               |      |            |      | <0.001  |
| Yes                          | 126           | 77.8 | 19         | 23.8 |         |
| No                           | 36            | 22.2 | 61         | 76.3 |         |
| Chemotherapy                 |               |      |            |      | 0.029   |
| Yes                          | 146           | 90.1 | 64         | 80.0 |         |
| No                           | 16            | 9.9  | 16         | 20.0 |         |

|                   |    |      |    |      |        |
|-------------------|----|------|----|------|--------|
| Radiation therapy |    |      |    |      | <0.001 |
| Yes               | 88 | 54.3 | 12 | 15.0 |        |
| No                | 74 | 45.7 | 68 | 85.0 |        |

---

ΔOthers include American Indian, AK Native, Asian, and Pacific Islander. HR: Hormone Receptor; TNBC: Triple-Negative Breast Cancer.

---

**Supplementary Table 2.** Multivariate analyses of OS and CSS according to metastatic organs in the validation cohort.

| Variable         | OS                  |          | CSS                 |          |
|------------------|---------------------|----------|---------------------|----------|
|                  | HR (95% CI)         | <i>P</i> | HR (95% CI)         | <i>P</i> |
| No metastasis    | Reference           |          | Reference           |          |
| Bone metastasis  | 3.106 (1.558-6.211) | 0.001    | 3.521 (1.733-7.143) | 0.001    |
| Lung metastasis  | 1.114 (1.395-2.577) | 0.014    | 1.789 (1.172-2.732) | 0.007    |
| Liver metastasis | 1.835 (1.245-2.703) | 0.002    | 1.789 (1.189-2.695) | 0.005    |
| Brain metastasis | 1.427 (1.051-1.938) | 0.023    | 1.368 (1.026-1.824) | 0.033    |
| DL metastasis    | 2.486 (1.163-5.317) | 0.019    | 2.506 (1.128-5.567) | 0.024    |

Adjusted for molecular subtype, age, race, marital status, grade, tumor size, regional lymph node invasion and therapies. OS: Overall Survival; CSS: Cancer Specific Survival; HR: Hazard Ratio.

**Supplementary Fig 1.** Distribution of distant metastatic organs according to molecular subtype in the validation cohort. DL, distant lymph node.

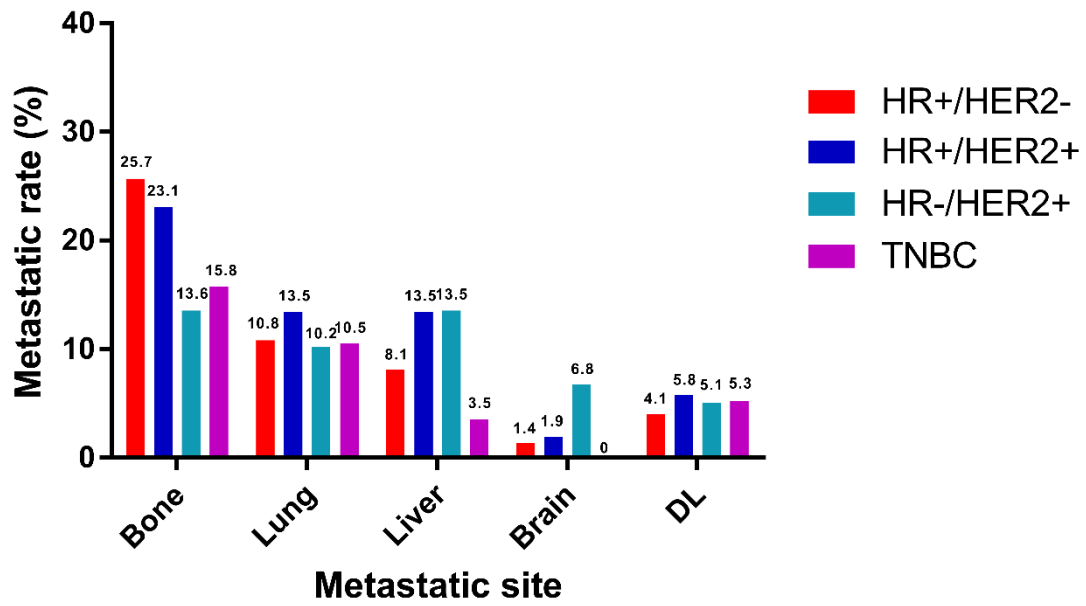

**Supplementary Fig 2.** Relative rates of single and combined metastatic sites in different molecular subtypes of inflammatory breast cancer in the validation cohort.

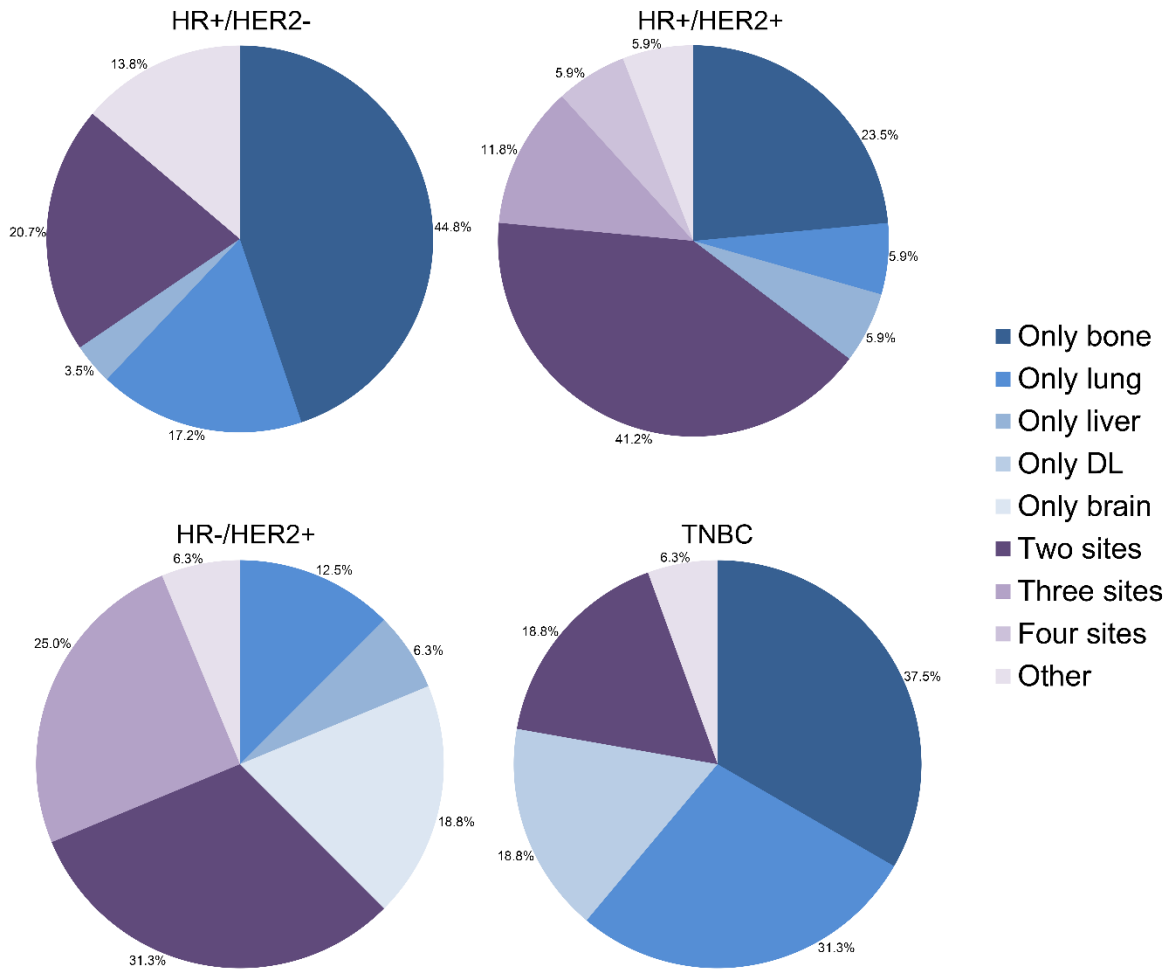

**Supplementary Fig 3.** Kaplan-Meier curves of cancer specific survival in patients according to metastatic status in the validation cohort.

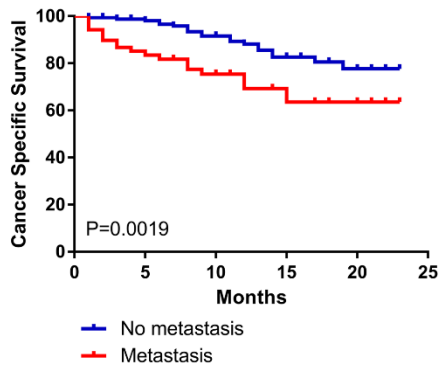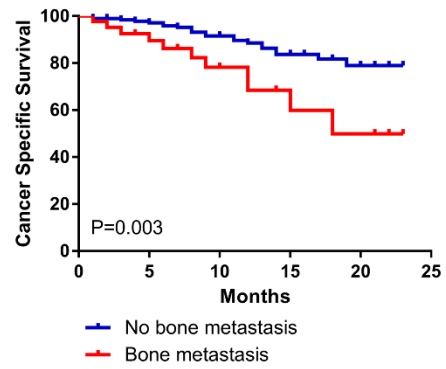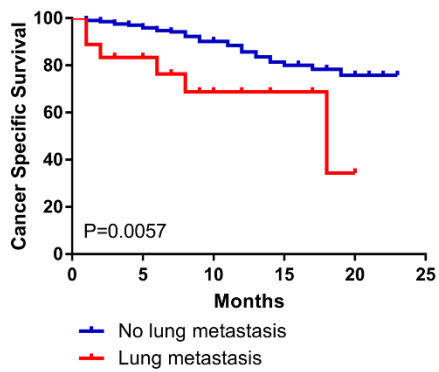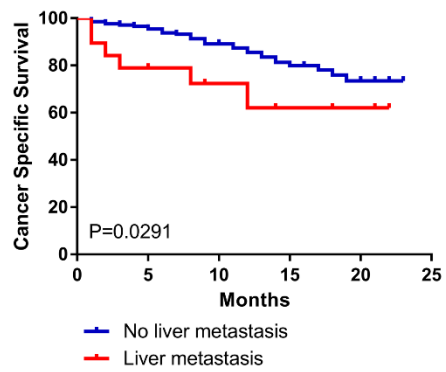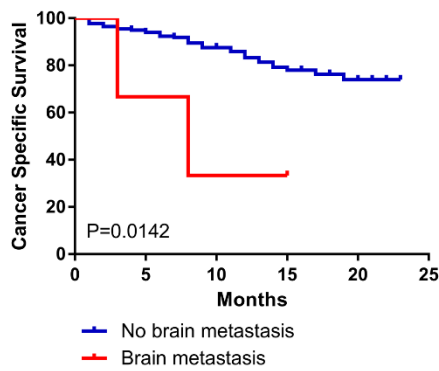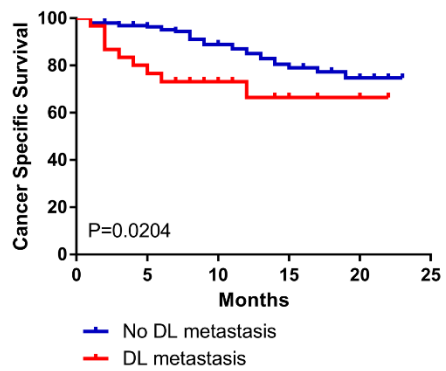

Supplement: jcav11p0292s1.pdf [file jcav11p0292s1.pdf]
